# Supplementary material for: The Usability and Effectiveness of Mobile Health Technology–Based Lifestyle and Medical Intervention Apps Supporting Health Care During Pregnancy: Systematic Review
Source: PubMed Central journal article supplement (PMC5941088; doi:10.2196/mhealth.8834), 2018-04-24
Supplement: mhealth_v6i4e109_app1.pdf [file mhealth_v6i4e109_app1.pdf]

Appendix 1. Search strategy.

**Date of search: February 6, 2017**

**Sources: Embase.com, Medline (Ovid), Cochrane Central, Web of Science, PubMed recent, Google scholar.**

---

| <i>Database</i>     | <i>Number of refs</i> | <i>Refs after deduplication</i> |
|---------------------|-----------------------|---------------------------------|
| Embase.com          | 1423                  | 1380                            |
| Medline Epub (Ovid) | 1270                  | 527                             |
| Cochrane Central    | 186                   | 8                               |
| Web of Science      | 1125                  | 455                             |
| Google Scholar      | 200                   | 117                             |
|                     |                       |                                 |
|                     |                       |                                 |
| <b>Total</b>        | <b>4204</b>           | <b>2487</b>                     |

**Results**

Removed duplicates: 1717

Update Feb 15<sup>th</sup> 2016 – Feb 6<sup>th</sup> 2017: 583

**Embase.com (Embase incl. Medline): 1423**

('mobile application'/de OR 'telehealth'/de OR 'mobile phone'/de OR 'text messaging'/de OR ('e-health' OR ehealth OR mhealth OR 'm-health' OR telehealth OR ((tele OR mobile) NEAR/3 health) OR smartphone\* OR ((mobile OR smart OR Android OR iOS) NEAR/3 (phone\* OR monitor\* OR device\*)) OR (mobile NEXT/1 based) OR 'm-phone' OR mphone\* OR 'cell phone' OR iphone OR ipad OR ipod OR ((app OR apps OR application\*) NEAR/3 (mobile OR portable OR tablet OR Android OR iOS OR web OR online OR communication OR customized)) OR (text NEAR/3 messag\*) OR SMS):ab,ti) **AND** ('pregnancy'/exp OR 'pregnant woman'/exp OR 'pregnancy outcome'/exp OR 'pregnancy complication'/exp OR 'morning sickness'/de OR 'perinatal care'/exp OR 'obstetrics'/exp OR 'prepregnancy care'/de OR 'fetus'/exp OR 'fetus outcome'/de OR 'fetus death'/de OR 'fetus mortality'/de OR 'newborn death'/de OR 'maternal mortality'/de OR 'maternal disease'/exp OR (obstetric\* OR pregnan\* OR gestation\* OR childbearing\* OR (child NEAR/3 bearing) OR gravid\* OR maternal\* OR maternity OR mother\* OR fetal\* OR foetal OR fetus OR foetus OR prepregnan\* OR preconception\* OR antenatal\* OR prenatal\* OR perinatal\* OR (morning NEXT/1 sickness) OR eclampsia\* OR stillbirth\*):ab,ti) **NOT** ([Animals]/lim NOT Humans]/lim)

**Medline (Ovid): 1270**

("Mobile Applications"/ OR "TeleMedicine"/ OR exp "Cell Phones"/ OR "Text Messaging"/ OR ("e-health" OR ehealth OR mhealth OR "m-health" OR telehealth OR ((tele OR mobile) ADJ3 health) OR smartphone\* OR ((mobile OR smart OR Android OR iOS) ADJ3 (phone\* OR monitor\* OR device\*))

OR (mobile ADJ1 based) OR "m-phone" OR mphone\* OR 'cell phone' OR iphone OR ipad OR ipod OR ((app OR apps OR application\*) ADJ3 (mobile OR portable OR tablet OR Android OR iOS OR web OR online OR communication OR customized)) OR (text ADJ3 messag\*) OR SMS).ab,ti.) **AND** (exp "Pregnancy"/ OR "Pregnant Women"/ OR exp "Pregnancy Complications"/ OR "Prenatal Care"/ OR "Perinatal Care"/ OR "Obstetrics"/ OR "Preconception Care"/ OR exp "Fetus"/ OR "Maternal Health"/ OR "Maternal Mortality"/ OR (obstetric\* OR pregnan\* OR gestation\* OR childbearing\* OR (child ADJ3 bearing) OR gravid\* OR maternal\* OR maternity OR mother\* OR fetal\* OR foetal OR fetus OR foetus OR prepregnan\* OR preconception\* OR antenatal\* OR prenatal\* OR perinatal\* OR (morning ADJ1 sickness) OR eclampsia\* OR stillbirth\*).ab,ti.) **NOT** (animals NOT humans).sh.

***Cochrane Central (trials): 186***

(('e-health' OR ehealth OR mhealth OR 'm-health' OR telehealth OR ((tele OR mobile) NEAR/3 health) OR smartphone\* OR ((mobile OR smart OR Android OR iOS) NEAR/3 (phone\* OR monitor\* OR device\*)) OR (mobile NEXT/1 based) OR 'm-phone' OR mphone\* OR 'cell phone' OR iphone OR ipad OR ipod OR ((app OR apps OR application\*) NEAR/3 (mobile OR portable OR tablet OR Android OR iOS OR web OR online OR communication OR customized)) OR (text NEAR/3 messag\*) OR SMS):ab,ti) **AND** ((obstetric\* OR pregnan\* OR gestation\* OR childbearing\* OR (child NEAR/3 bearing) OR gravid\* OR maternal\* OR maternity OR mother\* OR fetal\* OR foetal OR fetus OR foetus OR prepregnan\* OR preconception\* OR antenatal\* OR prenatal\* OR perinatal\* OR (morning NEXT/1 sickness) OR eclampsia\* OR stillbirth\*):ab,ti)

***Web of Science: 1125***

**TS=**(("e-health" OR ehealth OR mhealth OR "m-health" OR telehealth OR ((tele OR mobile) NEAR/2 health) OR smartphone\* OR ((mobile OR smart OR Android OR iOS) NEAR/2 (phone\* OR monitor\* OR device\*)) OR (mobile NEAR/1 based) OR "m-phone" OR mphone\* OR "cell phone" OR iphone OR ipad OR ipod OR ((app OR apps OR application\*) NEAR/2 (mobile OR portable OR tablet OR Android OR iOS OR web OR online OR communication OR customized)) OR (text NEAR/2 messag\*) OR SMS) **AND** (obstetric\* OR pregnan\* OR gestation\* OR childbearing\* OR (child NEAR/2 bearing) OR gravid\* OR maternal\* OR maternity OR mother\* OR fetal\* OR foetal OR fetus OR foetus OR prepregnan\* OR preconception\* OR antenatal\* OR prenatal\* OR perinatal\* OR (morning NEAR/1 sickness) OR eclampsia\* OR stillbirth\*) **NOT** ((animal\* OR rat OR rats OR mice OR mouse OR rabbit\* OR plant) NOT (human\*)))

***Google Scholar: 200 (top relevance)***

"e health"|ehealth|telehealth|"tele health"|"mobile|portable|tablet app|application|apps|device|phone| device"|"text messaging" pregnancy|pregnant|gestation|childbearing|maternal|mother|maternity| preconception
