# Supplementary material for: The Usability and Effectiveness of Mobile Health Technology–Based Lifestyle and Medical Intervention Apps Supporting Health Care During Pregnancy: Systematic Review
Source: PubMed Central journal article supplement (PMC5941088; doi:10.2196/mhealth.8834), 2018-04-24
Supplement: mhealth_v6i4e109_app3.pdf [file mhealth_v6i4e109_app3.pdf]

Appendix 3. Study characteristics of mHealth lifestyle applications

| <b>Author (year)<br/>location</b>           | <b>Subject</b>                                                        | <b>Study type</b>     | <b>N<br/>(intervention,<br/>control)</b> | <b>Intervention<br/>(name of<br/>intervention)</b>                       | <b>Gestational<br/>age (GA) at<br/>start<br/>intervention<br/>and mean GA<br/>at enrollment</b> |
|---------------------------------------------|-----------------------------------------------------------------------|-----------------------|------------------------------------------|--------------------------------------------------------------------------|-------------------------------------------------------------------------------------------------|
| van Zutphen<br>(2008)<br>The<br>Netherlands | Fruit,<br>vegetables,<br>smoking, folic<br>acid, alcohol              | Survey                | 408*                                     | eHealth<br>program                                                       | All gestational<br>ages                                                                         |
| Bot (2009)<br>The<br>Netherlands            | Fruit,<br>vegetables,<br>smoking, folic<br>acid, alcohol              | Prospective<br>cohort | 13946*                                   | Email-based<br>health<br>promotion<br>program.                           | All gestational<br>ages                                                                         |
| Dalrymple<br>(2013) USA                     | Fruit,<br>vegetables,<br>smoking, folic<br>acid, alcohol              | Survey                | 31                                       | MHealth<br>program for<br>behavior<br>change - SMS<br>(Text4baby)        | NA (~)                                                                                          |
| Song (2013)<br>USA                          | Vitamins,<br>morning<br>sickness,<br>foods,<br>abdominal<br>pains     | Pilot                 | 23                                       | Two-way text<br>messaging<br>system<br>(automatic<br>response<br>system) | Mean GA 22.5<br>weeks $\pm$ 5.08                                                                |
| Gazmararian<br>(2014) USA                   | Fruit,<br>vegetables,<br>physical<br>activity                         | Prospective<br>cohort | 83*                                      | MHealth<br>program for<br>behavior<br>change - SMS<br>(Text4baby)        | NA (~)                                                                                          |
| Evans (2015)<br>USA                         | Fruit,<br>vegetables,<br>prenatal<br>vitamins,<br>smoking,<br>alcohol | RCT <sup>^</sup>      | 943<br>(473 <sup>^</sup> ,470)           | MHealth<br>program for<br>behavior<br>change - SMS<br>(Text4baby)        | Before 14<br>weeks of<br>gestation.<br>Mean GA 8.1<br>weeks $\pm$ 1.9                           |

|                                  |                                                 |                                                 |             |                                                                                                         |                                                                                                              |
|----------------------------------|-------------------------------------------------|-------------------------------------------------|-------------|---------------------------------------------------------------------------------------------------------|--------------------------------------------------------------------------------------------------------------|
| van Dijk (2016) The Netherlands  | Fruit, vegetables, smoking, folic acid, alcohol | Survey                                          | 1878        | Web-based Smarter Pregnancy Platform                                                                    | Couples contemplating pregnancy or pregnant couples                                                          |
| Pollak (2014) USA                | Weight control                                  | RCT (pilot) and feasibility study               | 35 (23,12)* | SMS intervention (PregChat) vs generic texting intervention (Text4Baby)                                 | Between 12-21 weeks of gestation, mean GA at baseline 16 weeks                                               |
| Knight-Agarwall (2015) Australia | Weight control                                  | Mixed method: Survey, focus group and interview | 10          | An app with gestational weight gain calculator, general dietary information and motivation (Eating4Two) | Before 30 weeks of gestation, range between 13-30 weeks                                                      |
| Soltani (2015) UK                | Weight control                                  | Intervention and feasibility study              | 29 (14,15)  | Text message based intervention program (incl. 4 visits en food and activity daybook (MOMTech)          | Before 14 weeks of gestation                                                                                 |
| Herring (2016) USA               | Weight control                                  | RCT                                             | 66 (33,33)  | Technology-based behavioral weight control intervention - SMS, Facebook, telephonic counseling          | Before 20 weeks of gestation. Mean GA 13.4 weeks $\pm$ 4.1 (usual care), 11.5 weeks $\pm$ 2.9 (intervention) |

|                         |                                  |                                           |               |                                                                        |                                                                                        |
|-------------------------|----------------------------------|-------------------------------------------|---------------|------------------------------------------------------------------------|----------------------------------------------------------------------------------------|
| Choi (2015)<br>USA      | Physical activity                | RCT                                       | 30 (15,15)    | Mobile phone application as addition to Fitbit ultra                   | Between 10 and 20 weeks of gestation                                                   |
| Fujioka (2012)<br>Japan | Smoking cessation                | Prospective cohort                        | 66            | Mobile phone e-learning smoking cessation support program              | Over 20 weeks of gestation                                                             |
| Naughton (2012) UK      | Smoking cessation                | RCT and feasibility study                 | 207 (102,105) | Automated text messaging based smoking cessation intervention (MiQuit) | Before 21 weeks of gestation. Mean GA 12.7 ± 3.3 (intervention), 12.8 ± 3.2 (controls) |
| Naughton (2013) UK      | Smoking cessation                | Semi-structured interview and focus group | 13*           | Automated text messaging based smoking cessation intervention (MiQuit) | NA (~)                                                                                 |
| Pollak (2013)<br>USA    | Smoking cessation                | RCT and feasibility study                 | 31 (15,16)    | SMS support vs SMS support and Scheduled Gradual Reduction (SGR)       | Between 10-30 weeks gestation                                                          |
| Davis (2014)<br>USA     | Smoking cessation, mental health | Survey Pilot                              | 68<br>5       | E-health educational intervention on health behaviors                  | NA (~)                                                                                 |
| Abroms (2015) USA       | Smoking cessation                | Survey                                    | 20            | Proven smoking-cessation text                                          | Before 30 weeks of gestation                                                           |

|                     |                              |                    |     |                                   |                                                          |
|---------------------|------------------------------|--------------------|-----|-----------------------------------|----------------------------------------------------------|
|                     |                              |                    |     | message based program (Quit4baby) |                                                          |
| Moniz (2015)<br>USA | Smoking cessation, nutrition | Prospective cohort | 171 | Text message based intervention   | Before 28 weeks of gestation.<br>Mean GA 15.7<br>±6.2 SD |

\*analysis of the pregnant women in this cohort

(~) NA= not available
