# Supplementary material for: The Usability and Effectiveness of Mobile Health Technology–Based Lifestyle and Medical Intervention Apps Supporting Health Care During Pregnancy: Systematic Review
Source: PubMed Central journal article supplement (PMC5941088; doi:10.2196/mhealth.8834), 2018-04-24
Supplement: mhealth_v6i4e109_app4.pdf [file mhealth_v6i4e109_app4.pdf]

Appendix 4. Study characteristics of mHealth medical applications

| <b>Author (year)<br/>location</b> | <b>Subject</b> | <b>Study type</b>     | <b>N<br/>(intervention,<br/>control)</b> | <b>Intervention<br/>(name of<br/>intervention)</b>                                                           | <b>Gestational<br/>age (GA) at<br/>start<br/>intervention<br/>and mean GA<br/>at enrollment<br/>if applicable.</b> |
|-----------------------------------|----------------|-----------------------|------------------------------------------|--------------------------------------------------------------------------------------------------------------|--------------------------------------------------------------------------------------------------------------------|
| Zairina (2015)<br>Australia       | Asthma         | RCT                   | 72 (36,36)                               | Management of Asthma with Supportive Telehealth of Respiratory function in pregnancy (MASTERY) vs usual care | Before 20 weeks of gestation.<br>Mean GA 17.7 weeks $\pm$ 3.1                                                      |
| Carral (2015)<br>Spain            | Diabetes       | CT(^) (self-selected) | 104 (40,64)                              | Web-based telemedicine monitoring system (DiabeTIC)                                                          | Before 30 weeks of gestation.<br>Mean GA 21.1 weeks $\pm$ 9.6                                                      |
| Homko (2012)<br>USA               | Diabetes       | RCT                   | 80 (40,40)                               | Web-based nurse-coordinated communication system                                                             | Before 33 weeks of gestation.<br>Mean GA 28.4 weeks $\pm$ 3.4 (controls),<br>28.5 $\pm$ 4.2 (telemedicine)         |
| Homko (2007)<br>USA               | Diabetes       | RCT                   | 63 (34,29)                               | Telemedicine system                                                                                          | Before 33 weeks of gestation.<br>Mean GA 27.7 weeks $\pm$ 3.8 (controls),<br>27.5 $\pm$ 4.2                        |

|                          |                       |                             |                                                                           |                                                                                                                                    |                                      |
|--------------------------|-----------------------|-----------------------------|---------------------------------------------------------------------------|------------------------------------------------------------------------------------------------------------------------------------|--------------------------------------|
|                          |                       |                             |                                                                           |                                                                                                                                    | (telemedicine)                       |
| Hirst (2015)<br>UK       | Diabetes              | Survey                      | 52                                                                        | Interactive blood glucose management system                                                                                        | Before 34 weeks of gestation         |
| Nicholson (2016) USA     | Diabetes              | Single-arm pretest-posttest | 23                                                                        | Web-based pregnancy and postpartum lifestyle intervention (GooDMomS)                                                               | Mean GA at baseline 28.9 ± 3.4 weeks |
| Perez-Ferre (2010) Spain | Diabetes              | RCT                         | 100 (50,50)                                                               | Telemedicine system with a glucometer, application and SMS                                                                         | Before 28 weeks of gestation         |
| Stockwell (2014) USA     | Influenza vaccination | RCT                         | 1187 (593,594)                                                            | Automated text message based intervention of influenza vaccine reminders                                                           | All gestational ages                 |
| Jordan (2015) USA        | Influenza vaccination | RCT*^                       | Total: 16830<br>Planners: 5024(2468,2556)<br>Non-planners 5292(2666,2626) | Four interventions: Planners: 1= an encouragement message 2= an encouragement message plus the opportunity to schedule a reminder. | All gestational ages                 |

|                        |                          |     |               |                                                                                                                                |                                              |
|------------------------|--------------------------|-----|---------------|--------------------------------------------------------------------------------------------------------------------------------|----------------------------------------------|
|                        |                          |     |               | Non-planners:<br>3= receive<br>general<br>education 4=<br>education<br>tailored to<br>their reason<br>for non-<br>vaccination. |                                              |
| Yudin (2017)<br>Canada | Influenza<br>vaccination | RCT | 317 (153,164) | Text message<br>based<br>intervention<br>(twice weekly<br>for four<br>weeks)                                                   | All gestational<br>ages. Mean<br>GA 22 weeks |

\*Analysis of the pregnant women in this cohort

^More than one intervention

~Several types of diabetes combined

(\*)Salivary validated seven consecutive days of non-smoking

(^)CT= Controlled trial

(~)NA= not available
