# Supplementary material for: The Usability and Effectiveness of Mobile Health Technology–Based Lifestyle and Medical Intervention Apps Supporting Health Care During Pregnancy: Systematic Review
Source: PubMed Central journal article supplement (PMC5941088; doi:10.2196/mhealth.8834), 2018-04-24
Supplement: mhealth_v6i4e109_app5.pdf [file mhealth_v6i4e109_app5.pdf]

Appendix 5. Complete overview of results on mHealth lifestyle applications

| Author year      | Focus                                           | Usability                                                                                                                                                  |                                                                                                   |                                     |                                                                        | Acceptability                                                             |                                                                               |                | Effectiveness |
|------------------|-------------------------------------------------|------------------------------------------------------------------------------------------------------------------------------------------------------------|---------------------------------------------------------------------------------------------------|-------------------------------------|------------------------------------------------------------------------|---------------------------------------------------------------------------|-------------------------------------------------------------------------------|----------------|---------------|
|                  |                                                 | Actual use                                                                                                                                                 | Interest                                                                                          | Appropriateness                     | Ability                                                                | User satisfaction                                                         | Appreciation                                                                  | Recommendation |               |
| van Zutphen 2008 | Fruit, vegetables, smoking, folic acid, alcohol | 59% of sent quiz emails were opened and of those 85% of the questions were accessed. 37% of the practical tips 12% of links to related websites were used. |                                                                                                   |                                     | 96% of respondents (n=163) evaluated the program as easy to understand |                                                                           | 81% of respondents (n=163) evaluated the program as reliable.                 |                |               |
| Bot 2009         | Fruit, vegetables, smoking, folic acid, alcohol | 16% of participants opened all quiz emails received. 18% of participants never opened a quiz email. 27% of participants ceased participation.              |                                                                                                   |                                     |                                                                        |                                                                           | 78% of the respondents (n=3763) showed a high or intermediate appreciation.   |                |               |
| Dalrymple 2013   | Fruit, vegetables, smoking, folic acid, alcohol |                                                                                                                                                            | Many participants expressed an interest in continuing to seek health information on the internet. |                                     |                                                                        | All respondents found the program was "very" or "somewhat" helpful (n=7). | All respondents found the program was "very" or "somewhat" interesting (n=7). |                |               |
| Song 2013        | Vitamins, morning sickness,                     |                                                                                                                                                            |                                                                                                   | 65% agreed/strongly agreed that the | 80% agreed or strongly agreed that it was easy to                      |                                                                           |                                                                               |                |               |

|                  |                                                        |                                                                                                            |                                                                    |                                     |                                                                                                                         |                                                                                                              |  |                                                                                     |                                                                                                                                                                                                                                                                                                                                       |
|------------------|--------------------------------------------------------|------------------------------------------------------------------------------------------------------------|--------------------------------------------------------------------|-------------------------------------|-------------------------------------------------------------------------------------------------------------------------|--------------------------------------------------------------------------------------------------------------|--|-------------------------------------------------------------------------------------|---------------------------------------------------------------------------------------------------------------------------------------------------------------------------------------------------------------------------------------------------------------------------------------------------------------------------------------|
|                  | foods, abdominal pains                                 |                                                                                                            |                                                                    | information was easy to understand. | text their questions. 65% agreed or strongly agreed using the text message service made finding answers quick and easy. |                                                                                                              |  |                                                                                     |                                                                                                                                                                                                                                                                                                                                       |
| Gazmararian 2014 | Fruit, vegetables, physical activity                   | 95 % of the respondents (n=50) regularly read all messages throughout the study.                           | 88 % of the respondents (n=50) planned to continue being enrolled. |                                     | 96% of the respondents (n=50) reported receiving messages without interruption.                                         |                                                                                                              |  |                                                                                     |                                                                                                                                                                                                                                                                                                                                       |
| van Dijk 2016    | Fruit, vegetables, smoking, folic acid, alcohol        |                                                                                                            |                                                                    |                                     |                                                                                                                         |                                                                                                              |  |                                                                                     | Effectiveness on all patients: Vegetable intake: improvement of 20.9% (6 weeks) and increase up to 26.3% (6 months) - Fruit intake improvement by 36.1 and 38.4% (6 weeks and 6 months), - Inadequate folic acid use: decrease of 53.6% and 56.3%, - Tobacco and alcohol use were reduced by 23.8% and 27.0% at 6 weeks and 6 months. |
| Evans 2015       | Fruit, vegetables, prenatal vitamins, smoking, alcohol |                                                                                                            |                                                                    |                                     |                                                                                                                         |                                                                                                              |  |                                                                                     | No significant difference in health behavior between intervention and controls. Significant lower self-reported alcohol consumption in high dosage intervention group.                                                                                                                                                                |
| Pollak 2014      | Weight control                                         | 86% of the respondents in the PregCHAT text arm reported reading their texts and responded to their texts. |                                                                    |                                     |                                                                                                                         | Women in the PregCHAT text arm rated the program as helpful (64% rated 5 or higher on a 7-point Likert item) |  | 80 % of the women in the PregCHAT text arm would recommend the program to a friend. | There was a non-significant difference in mean gestational weight gain 6 pounds less for women who completed the intervention, between the PregCHAT arm and the Txt4Baby arm. No differential treatment effect was found in self-reported physical activity or the nutrition score.                                                   |

|                              |                      |                                                                         |                                                                                 |  |                                                               |                                                                                                                                                                                                                                                                                                                                                   |                                                                      |  |                                                                                                                                                                                                  |
|------------------------------|----------------------|-------------------------------------------------------------------------|---------------------------------------------------------------------------------|--|---------------------------------------------------------------|---------------------------------------------------------------------------------------------------------------------------------------------------------------------------------------------------------------------------------------------------------------------------------------------------------------------------------------------------|----------------------------------------------------------------------|--|--------------------------------------------------------------------------------------------------------------------------------------------------------------------------------------------------|
| Knights-<br>Agarwall<br>2015 | Weight<br>control    |                                                                         | Most women<br>expressed desire<br>to continue using<br>the application.         |  | Women found the<br>application<br>generally simple<br>to use. | 70% found the<br>weight gain graph<br>helpful. 80%<br>found the nutrition<br>advise helpful or<br>very helpful.                                                                                                                                                                                                                                   | Participants<br>enjoyed using the<br>application.                    |  |                                                                                                                                                                                                  |
| Soltani 2015                 | Weight<br>control    |                                                                         | Some participants<br>suggested<br>continuing the<br>intervention<br>postnatally |  |                                                               |                                                                                                                                                                                                                                                                                                                                                   | Participants liked<br>the holistic nature<br>of the<br>intervention. |  | Mean GWG; 6.65 in intervention group vs 9.74 in<br>controls. (NB: No statistical analysis were performed<br>due to small sample size)                                                            |
| Herring<br>2016              | Weight<br>control    |                                                                         |                                                                                 |  |                                                               | 96% reported that<br>the skills they<br>learned in the<br>program were<br>extremely helpful<br>(at least an 8 on a<br>10-point scale);<br>96% found the<br>text messages<br>extremely useful.<br>82% found the<br>coach calls<br>extremely useful.<br>87% reported the<br>program was<br>extremely<br>successful in<br>changing eating<br>habits. |                                                                      |  | Weight gain was significantly reduced in the<br>intervention group compared to usual care (37% vs.<br>66%, P 0.033). No significant differences in neonatal<br>or obstetric outcomes were found. |
| Choi 2015                    | Physical<br>activity | 78% response rate<br>of daily messages<br>at two weeks<br>participation | Response rate<br>dropped to 24% at<br>ten weeks of<br>participation.            |  |                                                               |                                                                                                                                                                                                                                                                                                                                                   |                                                                      |  | Intervention participants tend to increase in daily<br>steps compared to control participants but not<br>significantly different.                                                                |

|               |                                  |                                                                                                                                                             |                                                                     |                                                                                                               |                                                   |                                                                                |                                                                                              |                                                                                                           |                                                                                                                                                                                                                                                                     |
|---------------|----------------------------------|-------------------------------------------------------------------------------------------------------------------------------------------------------------|---------------------------------------------------------------------|---------------------------------------------------------------------------------------------------------------|---------------------------------------------------|--------------------------------------------------------------------------------|----------------------------------------------------------------------------------------------|-----------------------------------------------------------------------------------------------------------|---------------------------------------------------------------------------------------------------------------------------------------------------------------------------------------------------------------------------------------------------------------------|
| Fujioka 2012  | Smoking cessation                |                                                                                                                                                             |                                                                     |                                                                                                               |                                                   |                                                                                |                                                                                              |                                                                                                           | The rate of non-smoking was 71.1% of participants who completed the study (n=48). Carbon monoxide exhalation levels significantly decreased (from 6.43 +/- 4.5 ppm at the beginning to 0.7 +/- 1.0 ppm in 1 month, to 0.29 +/- 1.08 in 3 months (P < 0.001).        |
| Naughton 2012 | Smoking cessation                | Of the MiQuit participants, the response rates to assessment text messages sent: 3 week smoking text message: 64% of the intervention arm, at 7 weeks: 51%. | 9% of the MiQuit participants discontinued the texts.               | 24% of the MiQuit participants thought the texts were annoying. 26% felt they had received too many messages. |                                                   |                                                                                | Between 81% and 96% of the MiQuit participants rated the messages as helpful to some degree. |                                                                                                           | At 3-month follow-up, there was no statistically significant difference between intervention and controls. (NB: the trial was not powered to detect a group difference on smoking outcomes)                                                                         |
| Naughton 2013 | Smoking cessation                |                                                                                                                                                             | Participants felt they would read all the texts.                    | Participants did not feel the approach of the intervention was inappropriate.                                 | Participants think the tool is highly convenient. |                                                                                |                                                                                              |                                                                                                           |                                                                                                                                                                                                                                                                     |
| Pollak 2013   | Smoking cessation                | 86% of women in both groups reported reading "all or most" of the support messages. Women in the SGR arm respond to 68% of alert texts within 60 min.       |                                                                     |                                                                                                               |                                                   | Women found the program helpful (mean score of 6 out of 7 in a 7-point scale). | Women found the program to be acceptable (mean score of 6 out of 7 in a 7-point scale)       | Most women would recommend the program to a friend, with 78% in both arms reporting 7 in a 7-point scale. | The intervention group tends to a lower prevalence of smoking: 7-day point prevalence of 13.4% versus 7.5% in favour of the SGR arm. (NB: given the small sample size, the purpose of the arms is simply to monitor for unexpected, gross differences between arms) |
| Davis 2014    | Smoking cessation, mental health | All participants read all text messages once or twice. (n=5)                                                                                                | 66% agreed and strongly agreed they were interested in the service. |                                                                                                               | The technology was user friendly. (n=5)           | All participants found the text messages useful. (n=5)                         |                                                                                              |                                                                                                           |                                                                                                                                                                                                                                                                     |

|             |                              |                                                         |  |                                                                              |  |                                                                                                    |                                              |                                                                 |                                                                                                                                                                                                                                                                                                                   |
|-------------|------------------------------|---------------------------------------------------------|--|------------------------------------------------------------------------------|--|----------------------------------------------------------------------------------------------------|----------------------------------------------|-----------------------------------------------------------------|-------------------------------------------------------------------------------------------------------------------------------------------------------------------------------------------------------------------------------------------------------------------------------------------------------------------|
| Abroms 2015 | Smoking cessation            | All respondents have read all the text messages (n=16). |  | Received number of text messages was "just right" (n=14) or "too few" (n=2). |  | All respondents (n=16): "agreed" and "completely agreed" that the program was helpful in quitting. | Most participants liked the program overall. | All respondents (n=16) would recommend the program to a friend. |                                                                                                                                                                                                                                                                                                                   |
| Moniz 2015  | Smoking cessation, nutrition |                                                         |  |                                                                              |  |                                                                                                    |                                              |                                                                 | Improvements in self-reported behaviour between baseline and follow-up: decreased tobacco use in 41% of the smokers (n=44). More consistent condom use in 7% of the sexually active participants (n=83). 32% more prenatal vitamin intake. 32% more frequent seatbelt use. 41% more frequent healthy food intake. |
