# Supplementary material for: The Usability and Effectiveness of Mobile Health Technology–Based Lifestyle and Medical Intervention Apps Supporting Health Care During Pregnancy: Systematic Review
Source: PubMed Central journal article supplement (PMC5941088; doi:10.2196/mhealth.8834), 2018-04-24
Supplement: mhealth_v6i4e109_app6.pdf [file mhealth_v6i4e109_app6.pdf]

Multimedia Appendix 6. Overview of studies reporting on lifestyle mHealth apps: feasibility.

| Author year                       | Technique                                                                                                                                                              | Focus                                           | Feasibility                                                                                                                                                |                                                                                                  |             |                                                                        |
|-----------------------------------|------------------------------------------------------------------------------------------------------------------------------------------------------------------------|-------------------------------------------------|------------------------------------------------------------------------------------------------------------------------------------------------------------|--------------------------------------------------------------------------------------------------|-------------|------------------------------------------------------------------------|
|                                   |                                                                                                                                                                        |                                                 | Actual use                                                                                                                                                 | Interest                                                                                         | Suitability | Ability                                                                |
| van Zutphen et al<br>2008<br>[17] | Email containing a quiz with a maximum of six questions, tailored to the stage of pregnancy on health related topics (nutrition, exercise, lifestyle, smoking, safety) | Fruit, vegetables, smoking, folic acid, alcohol | 59% of sent quiz emails were opened and of those 85% of the questions were accessed. 37% of the practical tips 12% of links to related websites were used. |                                                                                                  |             | 96% of respondents (n=163) evaluated the program as easy to understand |
| Bot et al<br>2009<br>[18]         | Emails containing quizzes on the topics: nutrition, smoking, physical activity, safety, lifestyle or care and pregnancy every 4 weeks                                  | Fruit, vegetables, smoking, folic acid, alcohol | 16% of participants opened all quiz emails received. 18% of participants never opened a quiz email. 27% of participants ceased participation.              |                                                                                                  |             |                                                                        |
| Dalrymple et al<br>2013<br>[19]   | Text messaging three times a week until a baby is 1 year of age; based on topics discussed in prenatal classes                                                         | Fruit, vegetables, smoking, folic acid, alcohol |                                                                                                                                                            | Many participants expressed an interest in continuing to seek health information on the internet |             |                                                                        |

|                                   |                                                                                                                                                                                                              |                                                          |                                                                                                            |                                                                   |                                                                           |                                                                                                                                                                           |
|-----------------------------------|--------------------------------------------------------------------------------------------------------------------------------------------------------------------------------------------------------------|----------------------------------------------------------|------------------------------------------------------------------------------------------------------------|-------------------------------------------------------------------|---------------------------------------------------------------------------|---------------------------------------------------------------------------------------------------------------------------------------------------------------------------|
| Song et al<br>2013<br>[20]        | Use of TuTalk, an existing system for two-way, text based dialog for question and answer                                                                                                                     | Vitamins<br>morning sickness<br>foods<br>abdominal pains |                                                                                                            |                                                                   | 65% agreed or strongly agreed that the information was easy to understand | 80% agreed or strongly agreed that it was easy to text their questions. 65% agreed or strongly agreed using the text message service made finding answers quick and easy. |
| Gazmararian et al<br>2014<br>[21] | Three weekly messages on nutrition and physical activity targeted to the weeks along in pregnancy or the age (in weeks) of their child.                                                                      | Fruit, vegetables, physical activity                     | 95% of the respondents (n=50) regularly read all messages throughout the study.                            | 88% of the respondents (n=50) planned to continue being enrolled. |                                                                           | 96% of the respondents (n=50) reported receiving messages without interruption                                                                                            |
| Pollak et al<br>2014<br>[23]      | SMS- texting intervention (PregCHAT) vs a generic texting intervention (Text4baby): PregCHAT = Personalized feedback based on women's intake of sweetened beverages, fruits and vegetables, fast food, daily | Weight control                                           | 86% of the respondents in the PregCHAT text arm reported reading their texts and responded to their texts. |                                                                   |                                                                           |                                                                                                                                                                           |

|                                               |                                                                                                                                                                                           |                          |                                                                                                                          |                                                                             |                                                                       |                                                            |
|-----------------------------------------------|-------------------------------------------------------------------------------------------------------------------------------------------------------------------------------------------|--------------------------|--------------------------------------------------------------------------------------------------------------------------|-----------------------------------------------------------------------------|-----------------------------------------------------------------------|------------------------------------------------------------|
|                                               | <p>steps taken and weight</p> <p>Text4baby = general information to improve health</p>                                                                                                    |                          |                                                                                                                          |                                                                             |                                                                       |                                                            |
| <p>Knight-Agarwal et al<br/>2015<br/>[24]</p> | <p>Eating4Two app which provided a graphing function to record the weight through the pregnancy with real-time feedback on weight gain and general information on antenatal nutrition</p> | <p>Weight control</p>    |                                                                                                                          | <p>Most women expressed desire to continue using the application</p>        |                                                                       | <p>Women found the application generally simple to use</p> |
| <p>Soltani et al<br/>2015<br/>[25]</p>        | <p>MOMTech: Text messages twice a day including self-monitoring weight management and feedback on setting goals</p>                                                                       | <p>Weight control</p>    |                                                                                                                          | <p>Some participants suggested continuing the intervention postnatally.</p> |                                                                       |                                                            |
| <p>Choi et al<br/>2015<br/>[22]</p>           | <p>SMS-texting intervention; daily messages and a mobile phone activity diary with automated feedback and self-monitoring systems</p>                                                     | <p>Physical activity</p> | <p>78% response rate of daily messages at two weeks participation.</p>                                                   | <p>Response rate dropped to 24% at ten weeks of participation</p>           |                                                                       |                                                            |
| <p>Naughton et al<br/>2012<br/>[26]</p>       | <p>Tailored self-help leaflet followed by an 11-week program of tailored text messages or (controls) a nontailored self-help leaflet</p>                                                  | <p>Smoking cessation</p> | <p>Of the MiQuit participants, the response rates to assessment text messages sent: 3 week smoking text message: 64%</p> | <p>Nine percent of the MiQuit participants discontinued the texts.</p>      | <p>24% of the MiQuit participants thought the texts were annoying</p> |                                                            |

|                          |                                                                                                                                   |                                  |                                                                                                                                                          |                                                                     |                                                                               |                                                   |
|--------------------------|-----------------------------------------------------------------------------------------------------------------------------------|----------------------------------|----------------------------------------------------------------------------------------------------------------------------------------------------------|---------------------------------------------------------------------|-------------------------------------------------------------------------------|---------------------------------------------------|
|                          |                                                                                                                                   |                                  | of the intervention arm, at 7 weeks: 51%.                                                                                                                |                                                                     | . 26% felt they had received too many messages .                              |                                                   |
| Naughton et al 2013 [27] | Tailored self-help leaflet followed by an 11-week program of tailored text messages or (controls) a nontailored self-help leaflet | Smoking cessation                |                                                                                                                                                          | Participants felt they would read all the texts.                    | Participants did not feel the approach of the intervention was inappropriate. | Participants think the tool is highly convenient. |
| Pollak et al 2013 [28]   | SMS-delivered support messages or support messages plus a scheduled gradual reduction (SGR)                                       | Smoking cessation                | 86% of women in both groups reported reading "all or most" of the support messages. Women in the SGR arm responded to 68% of alerts texts within 60 min. |                                                                     |                                                                               |                                                   |
| Davis et al 2014 [29]    | Daily text messages and three 20-min voice-over-Powerpoint weekly                                                                 | Smoking cessation, mental Health | All participants read all text messages once or twice (n=5).                                                                                             | 66% agreed and strongly agreed they were interested in the service. |                                                                               | The technology was user friendly (n=5).           |
| Abroms et al 2015 [30]   | Either receiving sms-text messaging for the TexT4baby program to                                                                  | Smoking cessation                | All respondents have read all the text messages                                                                                                          |                                                                     | Received number of text messages was "just                                    |                                                   |

|  |                                                                                                                                                                  |  |         |  |                                   |  |
|--|------------------------------------------------------------------------------------------------------------------------------------------------------------------|--|---------|--|-----------------------------------|--|
|  | improve health or receiving sms-text messaging for the Text4baby program as well as Quit4Baby program which aimed to improve self-efficacy for smoking cessation |  | (n=16). |  | right" (n=14) or "too few" (n=2). |  |
|--|------------------------------------------------------------------------------------------------------------------------------------------------------------------|--|---------|--|-----------------------------------|--|

## References

17. van Zutphen M, Milder IE, Bemelmans WJ. Usage of an online healthy lifestyle program by pregnant women attending midwifery practices in Amsterdam. *Prev Med.* 2008 Jun;46(6):552-7. PMID: 18302971. doi: S0091-7435(08)00006-6.[pii] 10.1016/j.ypmed.2008.01.003.
18. Bot M, Milder IE, Bemelmans WJ. Nationwide implementation of Hello World: a Dutch email-based health promotion program for pregnant women. *J Med Internet Res.* 2009 Jul 30;11(3):e24. PMID: 19674957. doi: v11i3e24.[pii] 10.2196/jmir.1183.
19. Dalrymple PW, Rogers M, Zach L, Turner K, Green M. Collaborating to develop and test an enhanced text messaging system to encourage health information seeking. *J Med Libr Assoc.* 2013 Jul;101(3):224-7. PMID: 23930095. doi: 10.3163/1536-5050.101.3.014 JMLA-D-12-00077.[pii]
20. Song H, May A, Vaidhyanathan V, Cramer EM, Owais RW, McRoy S. A two-way text-messaging system answering health questions for low-income pregnant women. *Patient Educ Couns.* 2013 Aug;92(2):182-7. PMID: 23711635. doi: S0738-3991(13)00174-2.[pii] 10.1016/j.pec.2013.04.016.
21. Gazmararian JA, Elon L, Yang B, Graham M, Parker R. Text4baby program: an opportunity to reach underserved pregnant and postpartum women? *Matern Child Health J.* 2014 Jan;18(1):223-32. PMID: 23494485. doi: 10.1007/s10995-013-1258-1.
22. Choi J, Lee JH, Vittinghoff E, Fukuoka Y. mHealth Physical Activity Intervention: A Randomized Pilot Study in Physically Inactive Pregnant Women. *Matern Child Health J.* 2016 May;20(5):1091-101. PMID: 26649879. doi: 10.1007/s10995-015-1895-7 10.1007/s10995-015-1895-7.[pii]
23. Pollak KI, Alexander SC, Bennett G, Lyna P, Coffman CJ, Bilheimer A, et al. Weight-related SMS texts promoting appropriate pregnancy weight gain: a pilot study. *Patient Educ Couns.* 2014 Nov;97(2):256-60. PMID: 25153313. doi: S0738-3991(14)00304-8.[pii] 10.1016/j.pec.2014.07.030.
24. Knight-Agarwal C, Davis DL, Williams L, Davey R, Cox R, Clarke A. Development and Pilot Testing of the Eating4two Mobile Phone App to Monitor Gestational Weight Gain. *JMIR Mhealth Uhealth.* 2015 Jun 05;3(2):e44. PMID: 26048313. doi: v3i2e44.[pii] 10.2196/mhealth.4071.
25. Soltani H, Duxbury AM, Arden MA, Dearden A, Furness PJ, Garland C. Maternal Obesity Management Using Mobile Technology: A Feasibility Study to Evaluate a Text Messaging Based

Complex Intervention during Pregnancy. *J Obes.* 2015;2015:814830. PMID: 25960889. doi: 10.1155/2015/814830.

26. Naughton F, Prevost AT, Gilbert H, Sutton S. Randomized controlled trial evaluation of a tailored leaflet and SMS text message self-help intervention for pregnant smokers (MiQuit). *Nicotine Tob Res.* 2012 May;14(5):569-77. PMID: 22311960. doi: ntr254.[pii] 10.1093/ntr/ntr254.

27. Naughton F, Jamison J, Sutton S. Attitudes towards SMS text message smoking cessation support: a qualitative study of pregnant smokers. *Health Educ Res.* 2013 Oct;28(5):911-22. PMID: 23640985. doi: cyt057.[pii]10.1093/her/cyt057.

28. Pollak KI, Lyna P, Bilheimer A, Farrell D, Gao X, Swamy GK, et al. A pilot study testing SMS text delivered scheduled gradual reduction to pregnant smokers. *Nicotine Tob Res.* 2013 Oct;15(10):1773-6. PMID: 23569007. doi: ntt045.[pii] 10.1093/ntr/ntt045.

29. Davis AM, Wambach KA, Nelson EL, Odar C, Lillis T, McKinley A, et al. Health behavior change in pregnant women: a two-phase study. *Telemed J E Health.* 2014 Dec;20(12):1165-9. PMID: 25289706. doi: 10.1089/tmj.2013.0374.

30. Abroms LC, Johnson PR, Heminger CL, Van Alstyne JM, Leavitt LE, Schindler-Ruwisch JM, et al. Quit4baby: results from a pilot test of a mobile smoking cessation program for pregnant women. *JMIR Mhealth Uhealth.* 2015 Jan 23;3(1):e10. PMID: 25650765. doi: v3i1e10.[pii] 10.2196/mhealth.3846.
