# Supplementary material for: The Usability and Effectiveness of Mobile Health Technology–Based Lifestyle and Medical Intervention Apps Supporting Health Care During Pregnancy: Systematic Review
Source: PubMed Central journal article supplement (PMC5941088; doi:10.2196/mhealth.8834), 2018-04-24
Supplement: mhealth_v6i4e109_app7.pdf [file mhealth_v6i4e109_app7.pdf]

Multimedia Appendix 7. Overview of studies reporting on lifestyle mHealth apps: acceptability.

| Author<br>Year                 | Technique                                                                                                                                                                                                          | Focus                                           | Acceptability                                                                                          |                                                                               |                                                                                     |
|--------------------------------|--------------------------------------------------------------------------------------------------------------------------------------------------------------------------------------------------------------------|-------------------------------------------------|--------------------------------------------------------------------------------------------------------|-------------------------------------------------------------------------------|-------------------------------------------------------------------------------------|
|                                |                                                                                                                                                                                                                    |                                                 | User<br>satisfactio<br>n                                                                               | Suitability                                                                   | Recommendatio<br>n                                                                  |
| van Zutphen et al<br>2008 [17] | Email containing a quiz with a maximum of six questions, tailored to the stage of the pregnancy on health related topics (nutrition, exercise, lifestyle, smoking, safety)                                         | Fruit, vegetables, smoking, folic acid, alcohol |                                                                                                        | 81% of respondents (n=163) evaluated the program as reliable.                 |                                                                                     |
| Bot et al<br>2009 [18]         | Emails containing quizzes on the topics: nutrition, smoking, physical activity, safety, lifestyle or care and pregnancy every 4 weeks                                                                              | Fruit, vegetables, smoking, folic acid, alcohol |                                                                                                        | 78% of the respondents (n=3763) showed a high or intermediate appreciation.   |                                                                                     |
| Dalrymple et al<br>2013 [19]   | Text messaging three times a week until a baby is 1 year of age; based on topics discussed in prenatal classes                                                                                                     | Fruit, vegetables, smoking, folic acid, alcohol | All respondents found the program was "very" or "somewhat" helpful. (n=7).                             | All respondents found the program was "very" or "somewhat" interesting. (n=7) |                                                                                     |
| Pollak et al<br>2014 [23]      | SMS- texting intervention (PregCHAT) vs a generic texting intervention (Text4baby): PregCHAT = Personalized feedback based on women's intake of sweetened beverages, fruits and vegetables, fast food, daily steps | Weight control                                  | Women in the PregCHAT text arm rated the program as helpful (64% rated 5 or higher on a 7-point Likert |                                                                               | 80 % of the women in the PregCHAT text arm would recommend the program to a friend. |

|                                                          |                                                                                                                                                                                           |                       |                                                                                                                                                                                                               |                                                                   |  |
|----------------------------------------------------------|-------------------------------------------------------------------------------------------------------------------------------------------------------------------------------------------|-----------------------|---------------------------------------------------------------------------------------------------------------------------------------------------------------------------------------------------------------|-------------------------------------------------------------------|--|
|                                                          | <p>taken and weight</p> <p>TexT4baby = general information to improve health</p>                                                                                                          |                       | item)                                                                                                                                                                                                         |                                                                   |  |
| <p>Knight-<br/>Agarwall<br/>et al<br/><br/>2015 [24]</p> | <p>Eating4Two app which provided a graphing function to record the weight through the pregnancy with real-time feedback on weight gain and general information on antenatal nutrition</p> | <p>Weight control</p> | <p>70% found the weight gain graph helpful. 80% found the nutrition advise helpful or very helpful.</p>                                                                                                       | <p>Participants enjoyed using the application.</p>                |  |
| <p>Soltani et al<br/><br/>2015 [25]</p>                  | <p>MOMTech: Text messages twice a day including self-monitoring weight management and feedback on setting goals</p>                                                                       | <p>Weight control</p> |                                                                                                                                                                                                               | <p>Participants liked the holistic nature of the intervention</p> |  |
| <p>Herring et al<br/><br/>2016 [31]</p>                  | <p>Skills training and self-monitoring texts with personalized feedback by daily messages tailored to each behavioral goal to build skills and self-efficacy</p>                          | <p>Weight control</p> | <p>96% reported that the skills they learned in the program were extremely helpful (at least an 8 on a 10-point scale); 96% found the text messages extremely useful. 82% found the coach calls extremely</p> |                                                                   |  |

|                          |                                                                                                                                                                |                                 |                                                                                              |                                                                                        |                                                                                                           |
|--------------------------|----------------------------------------------------------------------------------------------------------------------------------------------------------------|---------------------------------|----------------------------------------------------------------------------------------------|----------------------------------------------------------------------------------------|-----------------------------------------------------------------------------------------------------------|
|                          |                                                                                                                                                                |                                 | useful. 87% reported the program was extremely successful in changing eating habits          |                                                                                        |                                                                                                           |
| Naughton et al 2012 [26] | Tailored self-help leaflet followed by an 11-week program of tailored text messages or (controls) a nontailored self-help leaflet                              | Smoking cessation               | Between 81% and 96% of the MiQuit participants rated the messages as helpful to some degree. |                                                                                        |                                                                                                           |
| Pollak et al 2013 [28]   | SMS-delivered support messages or support messages plus a scheduled gradual reduction (SGR)                                                                    | Smoking cessation               | Women found the program helpful (mean score of 6 out of 7 in a 7-point scale).               | Women found the program to be acceptable (mean score of 6 out of 7 in a 7-point scale) | Most women would recommend the program to a friend, with 78% in both arms reporting 7 in a 7-point scale. |
| Davis et al 2014 [29]    | Daily text messages and three 20-min voice-over-Powerpoint weekly                                                                                              | Smoking cessation mental Health | All participants found the text messages useful (n=5).                                       |                                                                                        |                                                                                                           |
| Abroms et al 2015 [30]   | Either receiving sms-text messaging for the TexT4baby program to improve health or receiving sms-text messaging for the TexT4baby program as well as Quit4Baby | Smoking cessation               | All respondents (n=16): "agreed" and "completely agreed" that the                            | Most participants liked the program overall.                                           | All respondents (n=16) would recommend the program to a friend.                                           |

|  |                                                                    |  |                                  |  |  |
|--|--------------------------------------------------------------------|--|----------------------------------|--|--|
|  | program which aimed to improve self-efficacy for smoking cessation |  | program was helpful in quitting. |  |  |
|--|--------------------------------------------------------------------|--|----------------------------------|--|--|

## References

17. van Zutphen M, Milder IE, Bemelmans WJ. Usage of an online healthy lifestyle program by pregnant women attending midwifery practices in Amsterdam. *Prev Med.* 2008 Jun;46(6):552-7. PMID: 18302971. doi: S0091-7435(08)00006-6.[pii] 10.1016/j.ypmed.2008.01.003.
18. Bot M, Milder IE, Bemelmans WJ. Nationwide implementation of Hello World: a Dutch email-based health promotion program for pregnant women. *J Med Internet Res.* 2009 Jul 30;11(3):e24. PMID: 19674957. doi: v11i3e24.[pii] 10.2196/jmir.1183.
19. Dalrymple PW, Rogers M, Zach L, Turner K, Green M. Collaborating to develop and test an enhanced text messaging system to encourage health information seeking. *J Med Libr Assoc.* 2013 Jul;101(3):224-7. PMID: 23930095. doi: 10.3163/1536-5050.101.3.014 JMLA-D-12-00077.[pii]
23. Pollak KI, Alexander SC, Bennett G, Lyna P, Coffman CJ, Bilheimer A, et al. Weight-related SMS texts promoting appropriate pregnancy weight gain: a pilot study. *Patient Educ Couns.* 2014 Nov;97(2):256-60. PMID: 25153313. doi: S0738-3991(14)00304-8.[pii] 10.1016/j.pec.2014.07.030.
24. Knight-Agarwal C, Davis DL, Williams L, Davey R, Cox R, Clarke A. Development and Pilot Testing of the Eating4two Mobile Phone App to Monitor Gestational Weight Gain. *JMIR Mhealth Uhealth.* 2015 Jun 05;3(2):e44. PMID: 26048313. doi: v3i2e44.[pii] 10.2196/mhealth.4071.
25. Soltani H, Duxbury AM, Arden MA, Dearden A, Furness PJ, Garland C. Maternal Obesity Management Using Mobile Technology: A Feasibility Study to Evaluate a Text Messaging Based Complex Intervention during Pregnancy. *J Obes.* 2015;2015:814830. PMID: 25960889. doi: 10.1155/2015/814830.
26. Naughton F, Prevost AT, Gilbert H, Sutton S. Randomized controlled trial evaluation of a tailored leaflet and SMS text message self-help intervention for pregnant smokers (MiQuit). *Nicotine Tob Res.* 2012 May;14(5):569-77. PMID: 22311960. doi: ntr254.[pii] 10.1093/ntr/ntr254.
28. Pollak KI, Lyna P, Bilheimer A, Farrell D, Gao X, Swamy GK, et al. A pilot study testing SMS text delivered scheduled gradual reduction to pregnant smokers. *Nicotine Tob Res.* 2013 Oct;15(10):1773-6. PMID: 23569007. doi: ntt045.[pii] 10.1093/ntr/ntt045.
29. Davis AM, Wambach KA, Nelson EL, Odar C, Lillis T, McKinley A, et al. Health behavior change in pregnant women: a two-phase study. *Telemed J E Health.* 2014 Dec;20(12):1165-9. PMID: 25289706. doi: 10.1089/tmj.2013.0374.
30. Abrams LC, Johnson PR, Heminger CL, Van Alstyne JM, Leavitt LE, Schindler-Ruwisch JM, et al. Quit4baby: results from a pilot test of a mobile smoking cessation program for pregnant women. *JMIR Mhealth Uhealth.* 2015 Jan 23;3(1):e10. PMID: 25650765. doi: v3i1e10.[pii] 10.2196/mhealth.3846.

31. Herring SJ, Cruice JF, Bennett GG, Rose MZ, Davey A, Foster GD. Preventing excessive gestational weight gain among African American women: A randomized clinical trial. *Obesity (Silver Spring)*. 2016 Jan;24(1):30-6. PMID: 26592857. doi: 10.1002/oby.21240
