# Supplementary material for: The Usability and Effectiveness of Mobile Health Technology–Based Lifestyle and Medical Intervention Apps Supporting Health Care During Pregnancy: Systematic Review
Source: PubMed Central journal article supplement (PMC5941088; doi:10.2196/mhealth.8834), 2018-04-24
Supplement: mhealth_v6i4e109_app8.pdf [file mhealth_v6i4e109_app8.pdf]

Multimedia Appendix 8. Overview of studies reporting on lifestyle mHealth apps: effectiveness.

| Author and year             | Technique                                                                                                                                                                                                                                                                                                 | Focus                                                      | Effectiveness                                                                                                                                                                                                                                                                                                                     |
|-----------------------------|-----------------------------------------------------------------------------------------------------------------------------------------------------------------------------------------------------------------------------------------------------------------------------------------------------------|------------------------------------------------------------|-----------------------------------------------------------------------------------------------------------------------------------------------------------------------------------------------------------------------------------------------------------------------------------------------------------------------------------|
| van Dijk et al<br>2016 [35] | Personal Web-based coaching based on identified nutrition and lifestyle risks factors at baseline by email and text messaging with a maximum of 3 per week                                                                                                                                                | Fruit, vegetables, smoking, folic acid, and alcohol        | Effectiveness on all patients: vegetable intake: improvement of 20.9% (6 weeks) and increase up to 26.3% (6 months). Fruit intake improvement by 36.1% and 38.4% at 6 weeks and 6 months, inadequate folic acid use: decrease of 53.6% and 56.3%, tobacco and alcohol use were reduced by 23.8% and 27.0% at 6 weeks and 6 months |
| Evans et al<br>2015 [34]    | Text messages 3 times a week, which were tailored to the gestational age focusing on intake of fruit, vegetables, alcohol, and prenatal vitamins as well as on smoking                                                                                                                                    | Fruit, vegetables, smoking, alcohol, and prenatal vitamins | No significant difference in health behavior between intervention and controls. Significant lower self-reported alcohol consumption in high-dosage intervention group                                                                                                                                                             |
| Pollak et al<br>2014 [23]   | SMS <sup>a</sup> -texting intervention (PregCHAT) vs a generic texting intervention (Text4baby):<br>PregCHAT=Personalized feedback based on women's intake of sweetened beverages, fruits and vegetables, fast food, daily steps taken, and weight<br><br>Text4baby=general information to improve health | Weight control                                             | There was a nonsignificant difference in mean gestational weight gain 6 pounds less for women who completed the intervention, between the PregCHAT arm and the Text4Baby arm. No differential treatment effect was found in self-reported physical activity or the nutrition score                                                |
| Soltani et al<br>2015 [25]  | MOMTech: Text messages twice a day including self-monitoring weight management and feedback on setting goals                                                                                                                                                                                              | Weight control                                             | Mean gestational weight gain; 6.65 in intervention group vs 9.74 in controls. (Note well: No statistical analysis were performed due to small sample size)                                                                                                                                                                        |
| Herring et al<br>2016 [31]  | Skills training and self-monitoring texts with personalized feedback by daily messages tailored to each behavioral goal                                                                                                                                                                                   | Weight control                                             | Weight gain was significantly reduced in the intervention group compared with usual care (37% vs 66%, $P=.03$ ). No significant differences were found in the neonatal or obstetric outcomes                                                                                                                                      |

|                             |                                                                                                                                                                                           |                              |                                                                                                                                                                                                                                                                                                                                                                                                                      |
|-----------------------------|-------------------------------------------------------------------------------------------------------------------------------------------------------------------------------------------|------------------------------|----------------------------------------------------------------------------------------------------------------------------------------------------------------------------------------------------------------------------------------------------------------------------------------------------------------------------------------------------------------------------------------------------------------------|
|                             | to build skills and self-efficacy                                                                                                                                                         |                              |                                                                                                                                                                                                                                                                                                                                                                                                                      |
| Choi et al<br>2015 [22]     | SMS-texting intervention; daily messages and a mobile phone activity diary with automated feedback and self-monitoring systems                                                            | Physical activity            | Intervention participants tend to increase in daily steps compared with control participants, but not significantly different                                                                                                                                                                                                                                                                                        |
| Fuijoka et al<br>2012 [32]  | e-learning program to support pregnant women who want to quit smoking                                                                                                                     | Smoking cessation            | The rate of nonsmoking was 71.1% of participants who completed the study (n=48). Carbon monoxide exhalation levels significantly decreased (from 6.43±4.5 ppm at the beginning to 0.7±1.0 ppm in 1 month, to 0.29±1.08 in 3 months ( $P<.001$ ).                                                                                                                                                                     |
| Naughton et al<br>2012 [26] | Tailored self-help leaflet followed by an 11-week program of tailored text messages or (controls) a nontailored self-help leaflet                                                         | Smoking cessation            | At 3-month follow-up, there was no statistically significant difference between intervention and controls. (NB: the trial was not powered to detect a group difference on smoking outcomes)                                                                                                                                                                                                                          |
| Pollak et al<br>2013 [28]   | SMS-delivered support messages or support messages plus a scheduled gradual reduction (SGR)                                                                                               | Smoking cessation            | The intervention group tends to a lower prevalence of smoking: 7-day point prevalence of 13.4% vs 7.5% in favor of the SGR arm. (NB: given the small sample size, the purpose of the arms is simply to monitor for unexpected, gross differences between arms)                                                                                                                                                       |
| Moniz et al<br>2015 [33]    | 12 weekly received text messages encouraging preventive health behaviors (tobacco cessation, condom use for disease prevention, nutrition optimization, seat belt use, and breastfeeding) | Smoking cessation, nutrition | Improvements in self-reported behavior between baseline and follow-up: decreased tobacco use in 41% of the smokers (n=44). More consistent condom use in 7% of the sexually active participants (n=83). Moreover, 32% of the participants reported more prenatal vitamin intake; 32% of the participants reported more frequent seatbelt use; and 41% of the participants reported more frequent healthy food intake |

<sup>a</sup>SMS: short message service.

## References

22. Choi J, Lee JH, Vittinghoff E, Fukuoka Y. mHealth Physical Activity Intervention: A Randomized Pilot Study in Physically Inactive Pregnant Women. *Matern Child Health J.* 2016 May;20(5):1091-101. PMID: 26649879. doi: 10.1007/s10995-015-1895-7 10.1007/s10995-015-1895-7.[pii]
23. Pollak KI, Alexander SC, Bennett G, Lyna P, Coffman CJ, Bilheimer A, et al. Weight-related SMS texts promoting appropriate pregnancy weight gain: a pilot study. *Patient Educ Couns.* 2014 Nov;97(2):256-60. PMID: 25153313. doi: S0738-3991(14)00304-8.[pii] 10.1016/j.pec.2014.07.030.

25. Soltani H, Duxbury AM, Arden MA, Dearden A, Furness PJ, Garland C. Maternal Obesity Management Using Mobile Technology: A Feasibility Study to Evaluate a Text Messaging Based Complex Intervention during Pregnancy. *J Obes.* 2015;2015:814830. PMID: 25960889. doi: 10.1155/2015/814830.
26. Naughton F, Prevost AT, Gilbert H, Sutton S. Randomized controlled trial evaluation of a tailored leaflet and SMS text message self-help intervention for pregnant smokers (MiQuit). *Nicotine Tob Res.* 2012 May;14(5):569-77. PMID: 22311960. doi: ntr254.[pii] 10.1093/ntr/ntr254.
28. Pollak KI, Lyna P, Bilheimer A, Farrell D, Gao X, Swamy GK, et al. A pilot study testing SMS text delivered scheduled gradual reduction to pregnant smokers. *Nicotine Tob Res.* 2013 Oct;15(10):1773-6. PMID: 23569007. doi: ntt045.[pii] 10.1093/ntr/ntt045.
31. Herring SJ, Cruice JF, Bennett GG, Rose MZ, Davey A, Foster GD. Preventing excessive gestational weight gain among African American women: A randomized clinical trial. *Obesity (Silver Spring).* 2016 Jan;24(1):30-6. PMID: 26592857. doi: 10.1002/oby.21240
32. Fujioka N, Kobayashi T, Turale S. Short-term behavioral changes in pregnant women after a quit-smoking program via e-learning: a descriptive study from Japan. *Nurs Health Sci.* 2012 Sep;14(3):304-11. PMID: 22950611. doi: 10.1111/j.1442-2018.2012.00702.x.
33. Moniz MH, Meyn LA, Beigi RH. Text Messaging to Improve Preventive Health Attitudes and Behaviors During Pregnancy: A Prospective Cohort Analysis. *J Reprod Med.* 2015 Sep-Oct;60(9-10):378-82. PMID: 26592061.
34. Evans W, Nielsen PE, Szekely DR, Bihm JW, Murray EA, Snider J, et al. Dose-response effects of the text4baby mobile health program: randomized controlled trial. *JMIR Mhealth Uhealth.* 2015 Jan 28;3(1):e12. PMID: 25630361. doi: v3i1e12.[pii] 10.2196/mhealth.3909.
35. van Dijk M, Huijgen NA, Willemsen SP, Laven JSE, Steegers EAP, Steegers-Theunissen RPM. Impact of an mHealth platform for pregnancy on nutrition and lifestyle of the reproductive population: a survey. *JMIR mHealth uHealth,* 2016 apr-jun; 4 (2): e53.
