# Supplementary material for: The Usability and Effectiveness of Mobile Health Technology–Based Lifestyle and Medical Intervention Apps Supporting Health Care During Pregnancy: Systematic Review
Source: PubMed Central journal article supplement (PMC5941088; doi:10.2196/mhealth.8834), 2018-04-24
Supplement: mhealth_v6i4e109_app9.pdf [file mhealth_v6i4e109_app9.pdf]

Appendix 6. Complete overview of results on mHealth medical applications

| Author year    | Focus    | Usability                                                                          |          |                                                                                        |                                                                                       | Acceptability                                                                          |                                                                                                                   |                | Effectiveness                                                                                                                                                                                                                                                                               |
|----------------|----------|------------------------------------------------------------------------------------|----------|----------------------------------------------------------------------------------------|---------------------------------------------------------------------------------------|----------------------------------------------------------------------------------------|-------------------------------------------------------------------------------------------------------------------|----------------|---------------------------------------------------------------------------------------------------------------------------------------------------------------------------------------------------------------------------------------------------------------------------------------------|
|                |          | Actual use                                                                         | Interest | Appropriateness                                                                        | Ability                                                                               | User satisfaction                                                                      | Appreciation                                                                                                      | Recommendation |                                                                                                                                                                                                                                                                                             |
| Zairina 2015   | Asthma   |                                                                                    |          |                                                                                        |                                                                                       |                                                                                        |                                                                                                                   |                | The changes in ACQ score from baseline to 3 months for MASTERY and usual care groups were $-0.01 \pm 0.11$ and $0.16 \pm 0.09$ . No significant difference in lung function.                                                                                                                |
| Carral 2015    | Diabetes |                                                                                    |          |                                                                                        |                                                                                       |                                                                                        |                                                                                                                   |                | No significant difference in HbA1c levels. Significantly less insulin treatment and less health care visits in intervention group                                                                                                                                                           |
| Homko 2012     | Diabetes |                                                                                    |          |                                                                                        |                                                                                       |                                                                                        |                                                                                                                   |                | No significant differences between the two groups in regard to maternal blood glucose values or infant birth weight.                                                                                                                                                                        |
| Homko 2007     | Diabetes |                                                                                    |          |                                                                                        |                                                                                       |                                                                                        |                                                                                                                   |                | No significant difference between the two groups blood glucose values and HbA1c levels. Significantly more women in the Internet group received insulin therapy (31% vs. 4%; $P < 0.05$ ). There were no significant differences in pregnancy and neonatal outcomes between the two groups. |
| Hirst 2015     | Diabetes |                                                                                    |          |                                                                                        |                                                                                       | 90% of the participants agreed or strongly agreed the management system is convenient. | 83% of the participants agreed or strongly agreed the management system is reliable.                              |                |                                                                                                                                                                                                                                                                                             |
| Nicholson 2016 | Diabetes | 65% of the participants logged in to the website at least 3 times during pregnancy |          | most participants ( $n = 8$ ) thought the website was user-friendly and easy to access | Women reported little to no experience with online discussion groups, but expressed a |                                                                                        | Average gestational weight gain for all participants was $19.9\text{lbs} \pm 13.2$ . No statistically significant |                |                                                                                                                                                                                                                                                                                             |

|                  |                       |                                                                                                                                                                                                                                                                          |  |  |                                                                                    |  |                                                                               |  |                                                                                                                                                                           |
|------------------|-----------------------|--------------------------------------------------------------------------------------------------------------------------------------------------------------------------------------------------------------------------------------------------------------------------|--|--|------------------------------------------------------------------------------------|--|-------------------------------------------------------------------------------|--|---------------------------------------------------------------------------------------------------------------------------------------------------------------------------|
|                  |                       | <p>“Using this program would probably...would be the first for me because I don’t do the message boards and things of that nature, but I’m willing to give it a try, just, you know, because somebody may know something more than I do, and it never hurts to ask.”</p> |  |  | <p>willingness to use a message board to communicate with other women with GDM</p> |  | <p>difference between baseline and 36 weeks of gestation in HbA1c levels.</p> |  |                                                                                                                                                                           |
| Perez-Ferre 2010 | Diabetes              |                                                                                                                                                                                                                                                                          |  |  |                                                                                    |  |                                                                               |  | No difference in maternal metabolic parameters nor in pregnancy outcome.                                                                                                  |
| Stockwell 2014   | Influenza vaccination |                                                                                                                                                                                                                                                                          |  |  |                                                                                    |  |                                                                               |  | Women in the intervention group were more likely to receive an influenza vaccination (AOR 1.3, CI 1.003-1.69).                                                            |
| Jordan 2015      | Influenza vaccination |                                                                                                                                                                                                                                                                          |  |  |                                                                                    |  |                                                                               |  | No significant increase of the odds of vaccination at follow-up. Significant increase of continued intent to be vaccinated later in the season (AOR 2.1, 95% CI 1.4, 3.1) |
| Yudin 2017       | Influenza vaccination |                                                                                                                                                                                                                                                                          |  |  |                                                                                    |  |                                                                               |  | No significant difference between the intervention and control group.                                                                                                     |
